# Supplementary material for: Glycerol-based sustainably sourced resin for volumetric printing
Source: Royal Society of Chemistry journal article supplement (doi:10.1039/d3gc03607c), 2024-01-01
Supplement: d3gc03607c1.pdf [file d3gc03607c1.pdf]

## Supporting Information

### Glycerol-based Sustainably Sourced Resin for Volumetric Printing

Eduards Krumins,<sup>a‡</sup> Joachim C. Lentz,<sup>a‡</sup> Ben Sutcliffe,<sup>b</sup> Ali Sohaib,<sup>c</sup> Philippa L. Jacob,<sup>a</sup> Benedetta Brugnoli,<sup>d</sup> Valentina Cuzzucoli Crucitti,<sup>c</sup> Robert Cavanagh,<sup>e,b</sup> Robert Owen,<sup>b</sup> Cara Moloney,<sup>e</sup> Laura Ruiz-Cantu,<sup>c</sup> Iolanda Francolini,<sup>d</sup> Steven M Howdle,<sup>a</sup> Maxim Shusteff,<sup>f</sup> Felicity R. A. J. Rose,<sup>b</sup> Ricky D. Wildman,<sup>c</sup> Yinfeng He<sup>c\*</sup> and Vincenzo Taresco<sup>a\*</sup>

- a. School of Chemistry, University of Nottingham, Nottingham, NG7 2RD, United Kingdom
- b. School of Pharmacy, Nottingham Biodiscovery Institute, University of Nottingham, NG7 2RD, Nottingham, United Kingdom
- c. Faculty of Engineering, University of Nottingham, Nottingham, NG7 2RD, UK,
- d. Department of Chemistry, Sapienza University of Rome, Piazzale A. Moro 5, 00185 Rome, Italy
- e. School of Medicine, University of Nottingham Biodiscovery Institute, University of Nottingham, NG7 2RD, United Kingdom
- f. Lawrence Livermore National Laboratory, Livermore, CA 94550, USA
- g. Nottingham Ningbo China Beacons of Excellence Research and Innovation Institute, University of Nottingham Ningbo China, Ningbo 315100, China

‡ Authors contributed equally.

\* Corresponding authors: [Yinfeng.He@nottingham.ac.uk](mailto:Yinfeng.He@nottingham.ac.uk),  
[Vincenzo.Taresco@nottingham.ac.uk](mailto:Vincenzo.Taresco@nottingham.ac.uk)

## Schemes, Figures and Tables

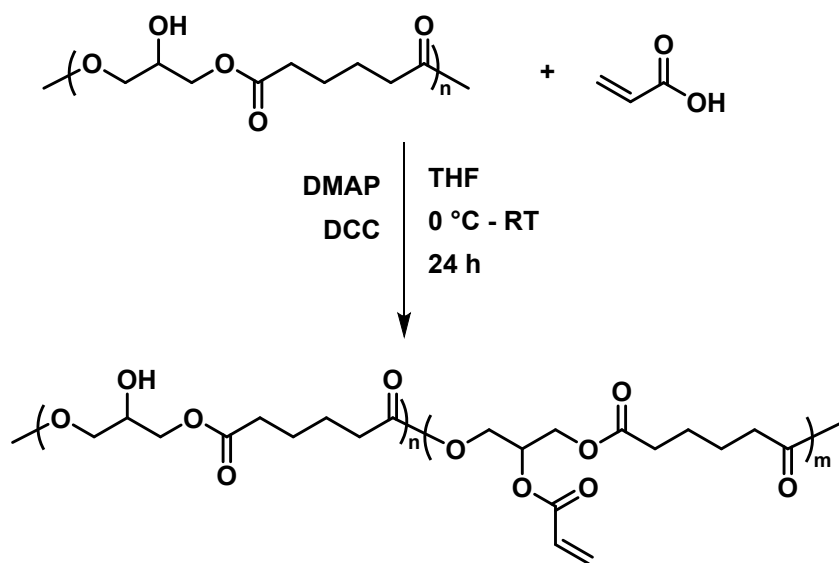

**SI Scheme 1.** Synthesis of PGA-A via Steglich esterification.

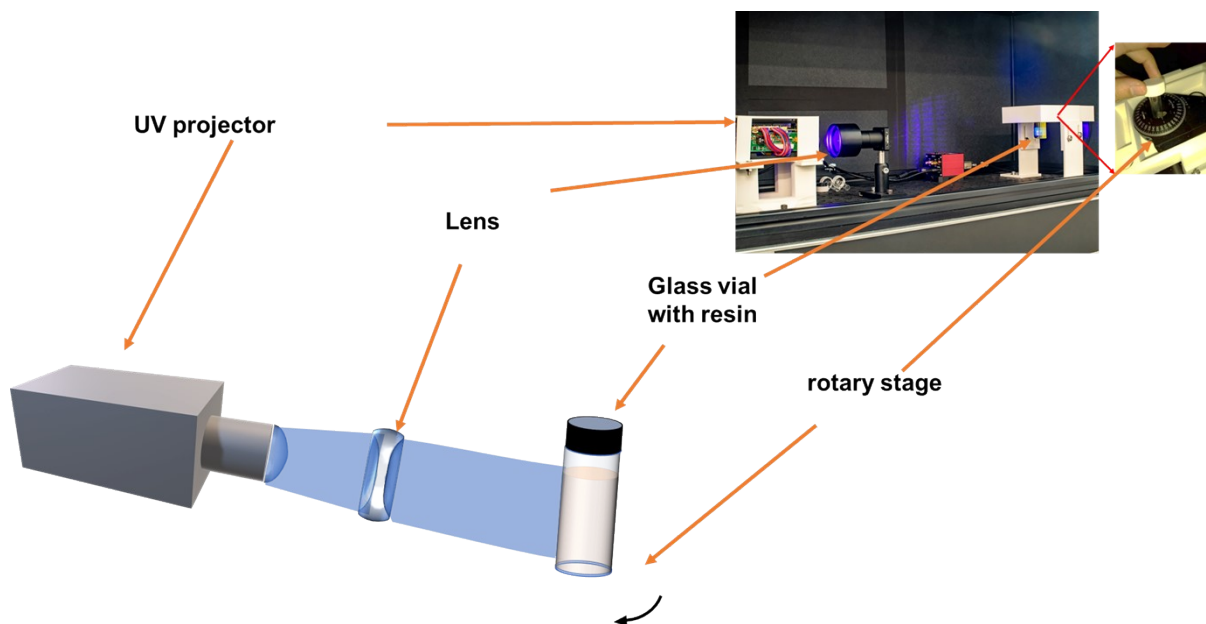

**SI Figure 1** Computed Axial Lithography (CAL) setup consisting of a projector, optics, and a rotary stage (based on hardware design files available from <https://github.com/computed-axial-lithography>).

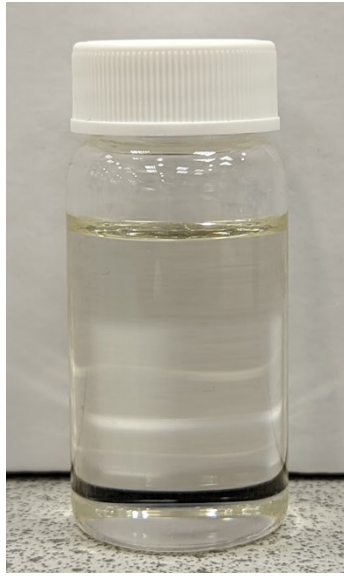

**SI Figure 2.** *Vial containing PG6-acrylate resin.*

T<sub>0</sub> <sup>1</sup>H-NMR

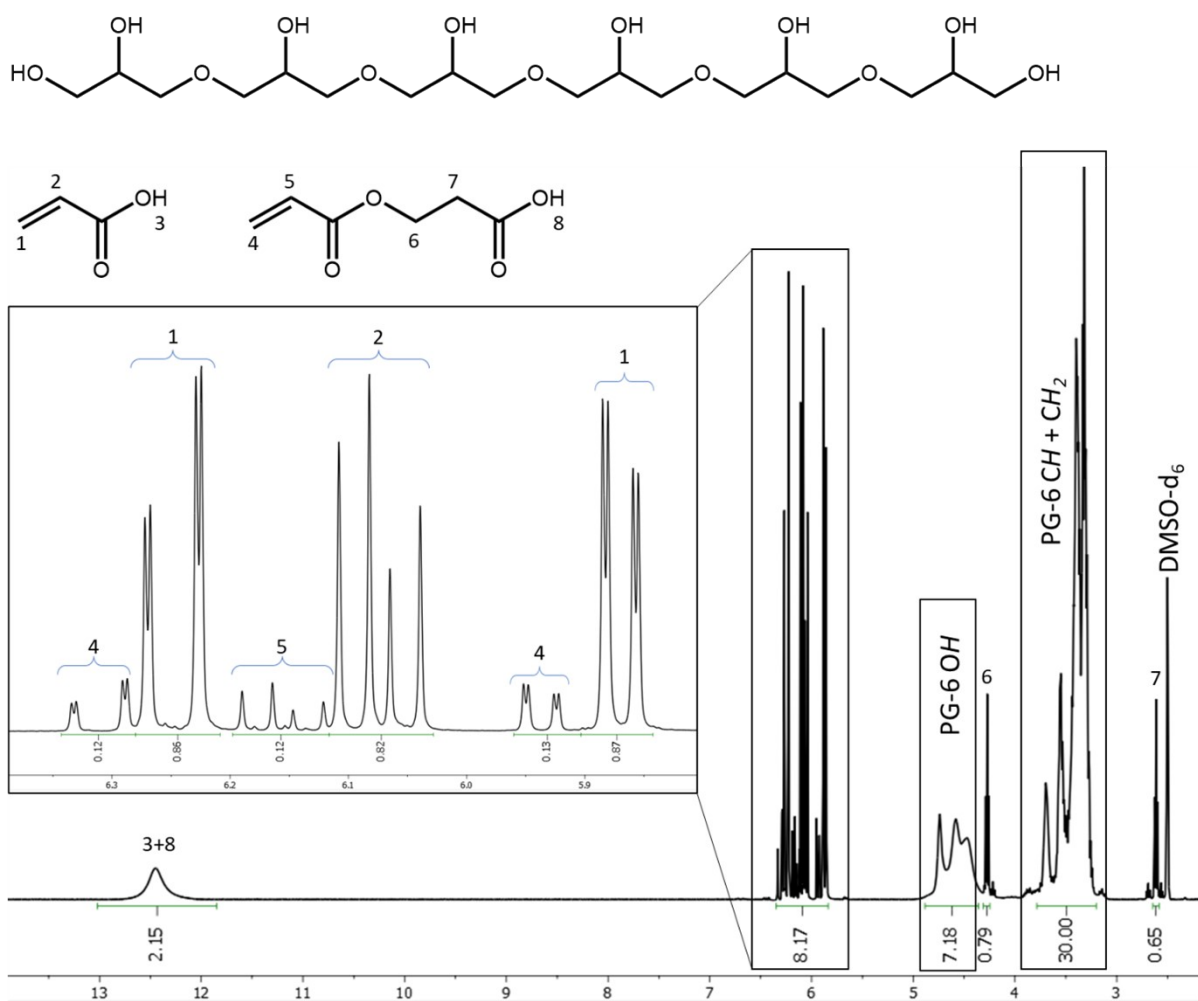

**SI Figure 3.** <sup>1</sup>H-NMR at Time Zero of resin synthesis. Note the presence of a -COOH signal around 12.5 ppm, and the presence of Michael addition product in the acrylic acid starting material.

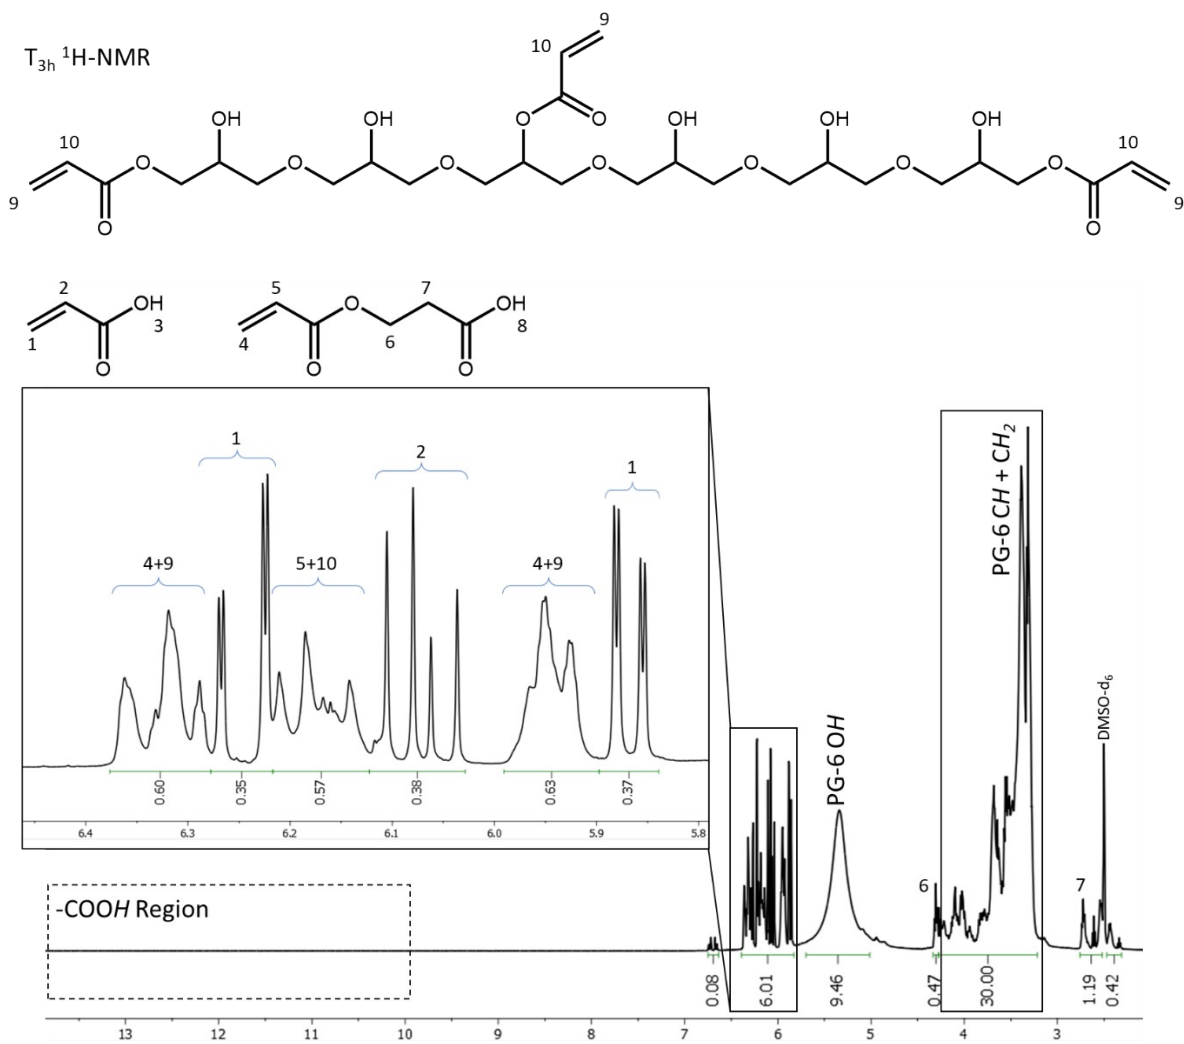

**SI Figure 4.**  $^1H$ -NMR at Time=3 h of resin synthesis. Inset showing the acrylate region of the spectrum. New signals corresponding to acrylate esters have formed. Conversion of acrylic acid is calculated to be approximately 63%, using the integrals of signals assigned 4+9 and 1. Some error in this estimation is a result of signal overlap between acrylic esters with the Michael addition product.

**SI Table 1** Acid Values of the reaction mixture with correction applied to account for the presence of catalytic sulphuric acid (AV of batch used= 1112 mg KOH g<sup>-1</sup>). Conversion was calculated following SI Equation 1.

| Time (h) | AV (mg KOH g <sup>-1</sup> sample) | Conversion of Acrylic Acid (%) |
|----------|------------------------------------|--------------------------------|
| 0        | 220.4                              | 0                              |
| 3        | 55.0                               | 75                             |

$$\text{Conversion (\%)} = 100 \times \left(1 - \frac{\text{AV Time zero}}{\text{AV Time X}}\right)$$

**SI Equation 1** Conversion of acrylic acid (%) from acid value obtained at time zero and at measured timepoint during PG6-acrylate synthesis.

**SI Table SEC**

|                | PG4   | PG6   | PG10   | PG6 acrylate |
|----------------|-------|-------|--------|--------------|
| M <sub>n</sub> | 250.0 | 330.0 | 1230.5 | 609.0        |
| M <sub>w</sub> | 315.0 | 467.0 | 3270.0 | 1233.0       |
| Đ              | 1.25  | 1.41  | 2.65   | 2.03         |

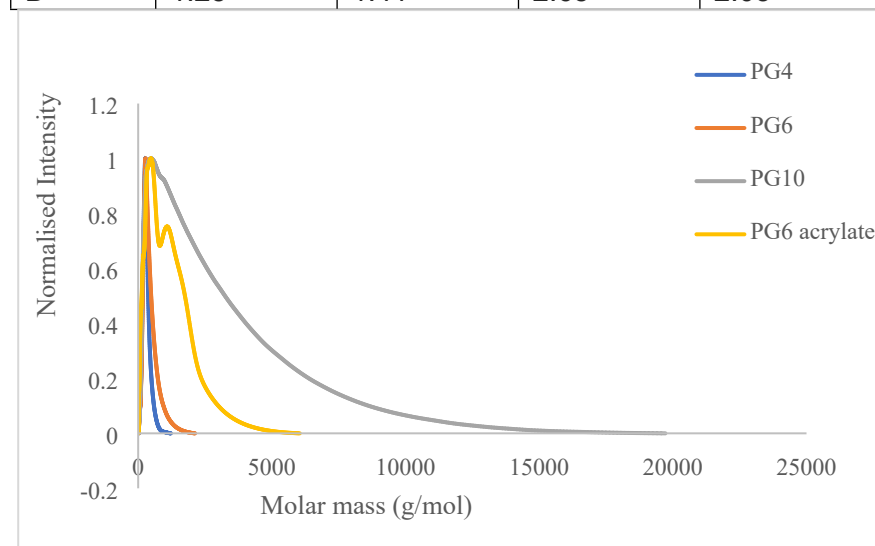

**SI Table and Figure SEC** – Molar masses (g/mol) and Đ for PG4, PG6, PG10, and PG6 acrylate. Measured via aqueous SEC.

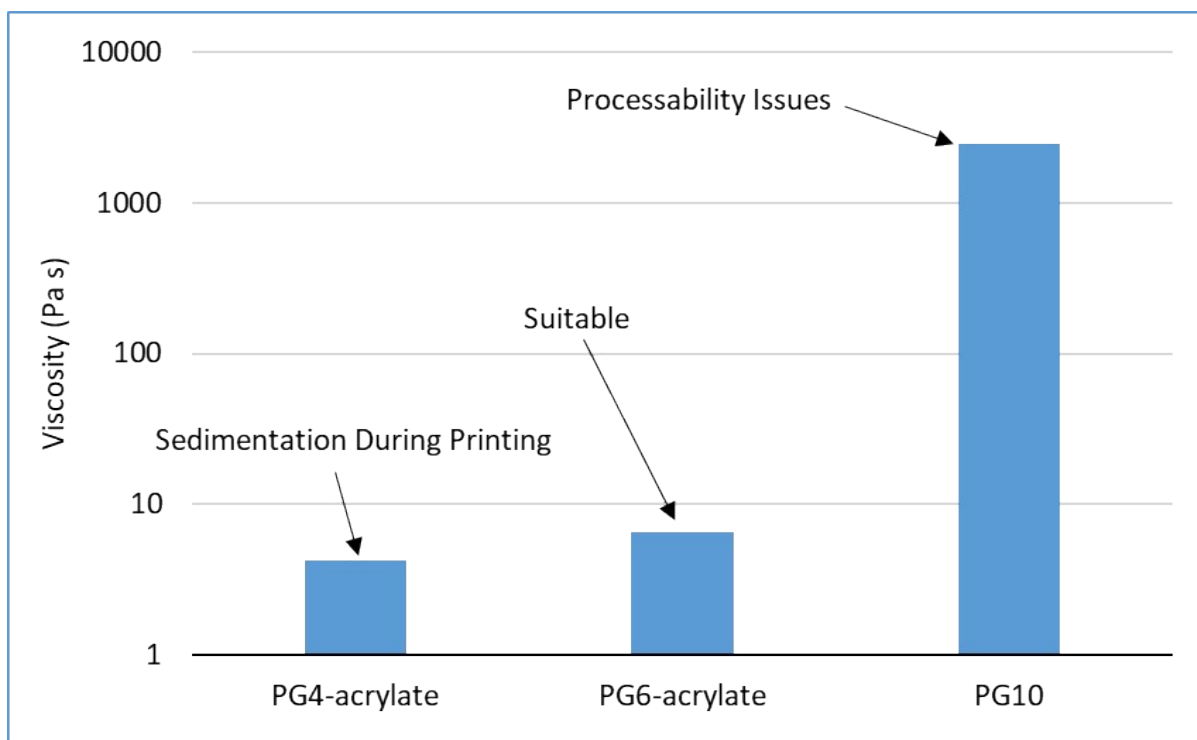

**SI Figure 5.** Viscosity of PG4-acrylate, PG6-acrylate, and PG10 at 25 °C, shear rate of  $10 \text{ s}^{-1}$ . Due to low viscosity, rapid sedimentation of the cured resin was observed with PG4-acrylate. PG10's viscosity made the resin synthesis impractical. PG6-acrylate's viscosity was found to be in the desired region.

**SI Table 2.** Volumetric Printing Optimisation of virgin Resin. Print result was assessed visually based on physical appearance of the print on a scale from 1 to 10, where 1 denotes a poor print and 10 an excellent print. Parts marked with an asterisk (\*) were produced using two consecutive printing cycles.

| Part                   | Vial size (mL) | Exposure per frame (s) | Frames    | Total Exposure Time (s) | Rotation per Frame (°) | Result |
|------------------------|----------------|------------------------|-----------|-------------------------|------------------------|--------|
| cylindrical structures | 4              | 0.1                    | 120       | 12                      | 3                      | 1      |
| cylindrical structures | 4              | 0.1                    | 40        | 4                       | 9                      | 2      |
| cylindrical structures | 4              | 0.1                    | 60        | 6                       | 6                      | 10     |
| Chess piece            | 4              | 0.1                    | 60        | 6                       | 6                      | 10     |
| Ball in cage           | 20             | 0.1                    | 60        | 6                       | 6                      | 1      |
| Ball in cage           | 20             | 0.12                   | 60        | 7.2                     | 6                      | 2      |
| Ball in cage           | 20             | 0.12                   | 120       | 14.4                    | 3                      | 3      |
| Ball in cage           | 20             | 0.12                   | 210       | 25.2                    | 3                      | 4      |
| Ball in cage           | 20             | 0.12                   | 160       | 19.2                    | 3                      | 6      |
| Ball in cage           | 20             | 0.12                   | 150       | 18                      | 3                      | 9      |
| Rectangle              | 20             | 0.1                    | 60        | 6                       | 3                      | 10     |
| Thinker*               | 20             | 0.11 + 0.11            | 120 + 120 | 26.4                    | 3                      | 9      |
| Rabbit*                | 20             | 0.12 + 0.15            | 120 + 30  | 18.9                    | 3                      | 9      |
| Tensile bar            | 20             | 0.12                   | 60        | 7.2                     | 6                      | 6      |
| Tensile bar            | 20             | 0.12                   | 120       | 14.4                    | 3                      | 9      |



**SI Table 3.** Volumetric Printing Optimisation of Recycled Resin. Print result was assessed visually based on physical appearance of the print on a scale from 1 to 10, where 1 denotes a poor print and 10 an excellent print.

| Part                   | Vial size (mL) | Exposure per frame (s) | Frames | Total Exposure Time (s) | Rotation per Frame (°) | Result |
|------------------------|----------------|------------------------|--------|-------------------------|------------------------|--------|
| cylindrical structures | 20             | 0.12                   | 120    | 14.4                    | 3                      | 10     |
| cylindrical structures | 20             | 0.12                   | 140    | 16.8                    | 3                      | 7      |
| cylindrical structures | 20             | 0.12                   | 120    | 12                      | 3                      | 10     |

**SI Table 4.** Volumetric Printing Optimisation of PGA-AA Doped Resin. Print result was assessed visually based on physical appearance of the print on a scale from 1 to 10, where 1 denotes a poor print and 10 an excellent print.

| Part                   | PGA Content (wt.%) | Vial size (mL) | Exposure per frame (s) | Frames | Total Exposure Time (sec) | Rotation per Frame (°) | Result |
|------------------------|--------------------|----------------|------------------------|--------|---------------------------|------------------------|--------|
| cylindrical structures | 5                  | 20             | 0.1                    | 120    | 12                        | 3                      | 8      |
| cylindrical structures | 10                 | 20             | 0.125                  | 120    | 15                        | 3                      | 7      |
| cylindrical structures | 20                 | 20             | 0.1                    | 100    | 10                        | 3                      | 10     |

**SI Table 5.** Volumetric Printing Optimisation of 10,12-Pentacosadynoic Acid (PCDA) Doped Resin. Print result was assessed visually based on physical appearance of the print on a scale from 1 to 10, where 1 denotes a poor print and 10 an excellent print.

| Part                   | PCDA Content (wt.%) | Vial size (mL) | Exposure per frame (s) | Frames | Total Exposure Time (s) | Rotation per Frame (°) | Result |
|------------------------|---------------------|----------------|------------------------|--------|-------------------------|------------------------|--------|
| cylindrical structures | 10                  | 4              | 0.12                   | 60     | 7.2                     | 6                      | 5      |
| cylindrical structures | 10                  | 4              | 0.12                   | 80     | 9.6                     | 3                      | 5      |
| cylindrical structures | 10                  | 4              | 0.12                   | 40     | 4.8                     | 6                      | 8      |
| cylindrical structures | 20                  | 4              | 0.12                   | 40     | 4.8                     | 6                      | 8      |
| cylindrical structures | 30                  | 4              | 0.12                   | 40     | 4.8                     | 6                      | 3      |

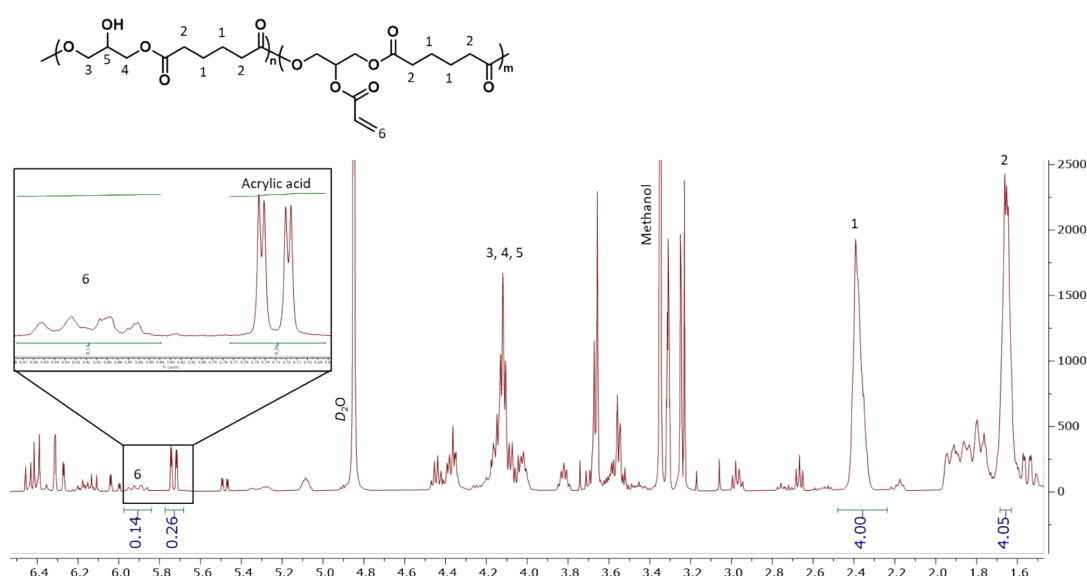

**SI Figure 6.** <sup>1</sup>H-NMR spectrum of PGA-A in D<sub>2</sub>O demonstrating ~14% functionalisation of pendant OH bonds along polymer backbone of PGA.

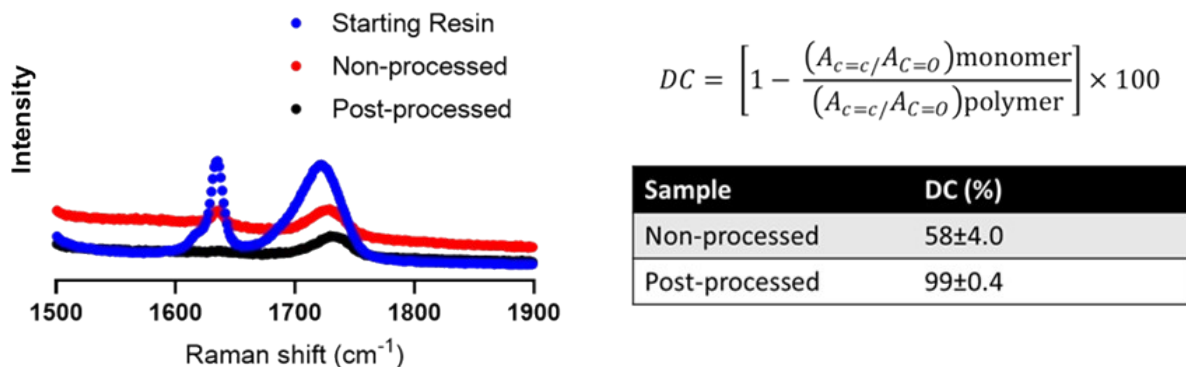

**SI Figure 7.** Raman Spectroscopy to assess degree of curing (DC). Left, Stacked Raman spectra of an example of starting resin, printed resin (non-processed) and resin post curing (post-processed) in the Raman shift range between 1500-1900  $\text{cm}^{-1}$ . Right, DC was determined by measuring the change in the ratio of peak areas associated with the C=C ( $\approx 1634 \text{ cm}^{-1}$ ) and C=O ( $\approx 1720 \text{ cm}^{-1}$ ) bonds before and after polymerisation.

**SI Table 6.** Storage modulus of printed cylindrical samples with increasing PGA-A loading.

| PGA-A Loading (wt%) | Storage Modulus (kPa) |
|---------------------|-----------------------|
| 0                   | 2221                  |
| 5                   | 450                   |
| 20                  | 522                   |

**SI Table 7.** Size of PCDA nanosystems non-polymerised, polymerised (blue) and after thermal stimulus (red)

| Sample    | Hydrodynamic diameter (nm) | PDI         |
|-----------|----------------------------|-------------|
| PCDA      | 152.1 ± 0.1                | 0.12 ± 0.10 |
| PCDA blue | 120.3 ± 0.5                | 0.21 ± 0.01 |
| PCDA red  | 293.2 ± 0.8                | 0.10 ± 0.01 |

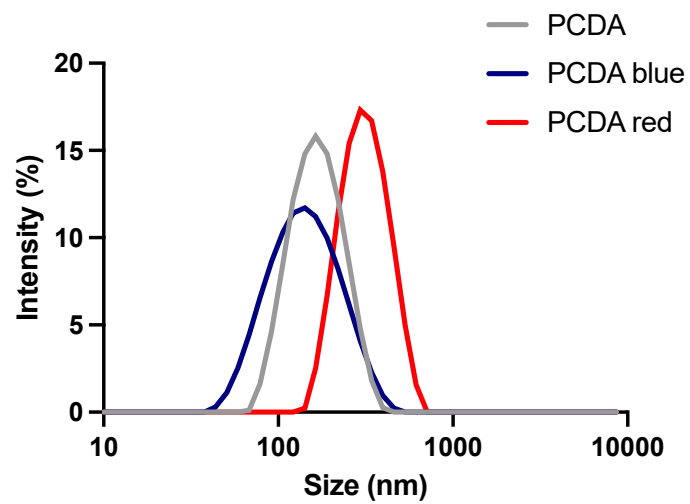

**SI Figure 8.** DLS traces of PCDA nanosystems non-polymerised (grey), polymerised (blue) and after thermal stimulus (red).

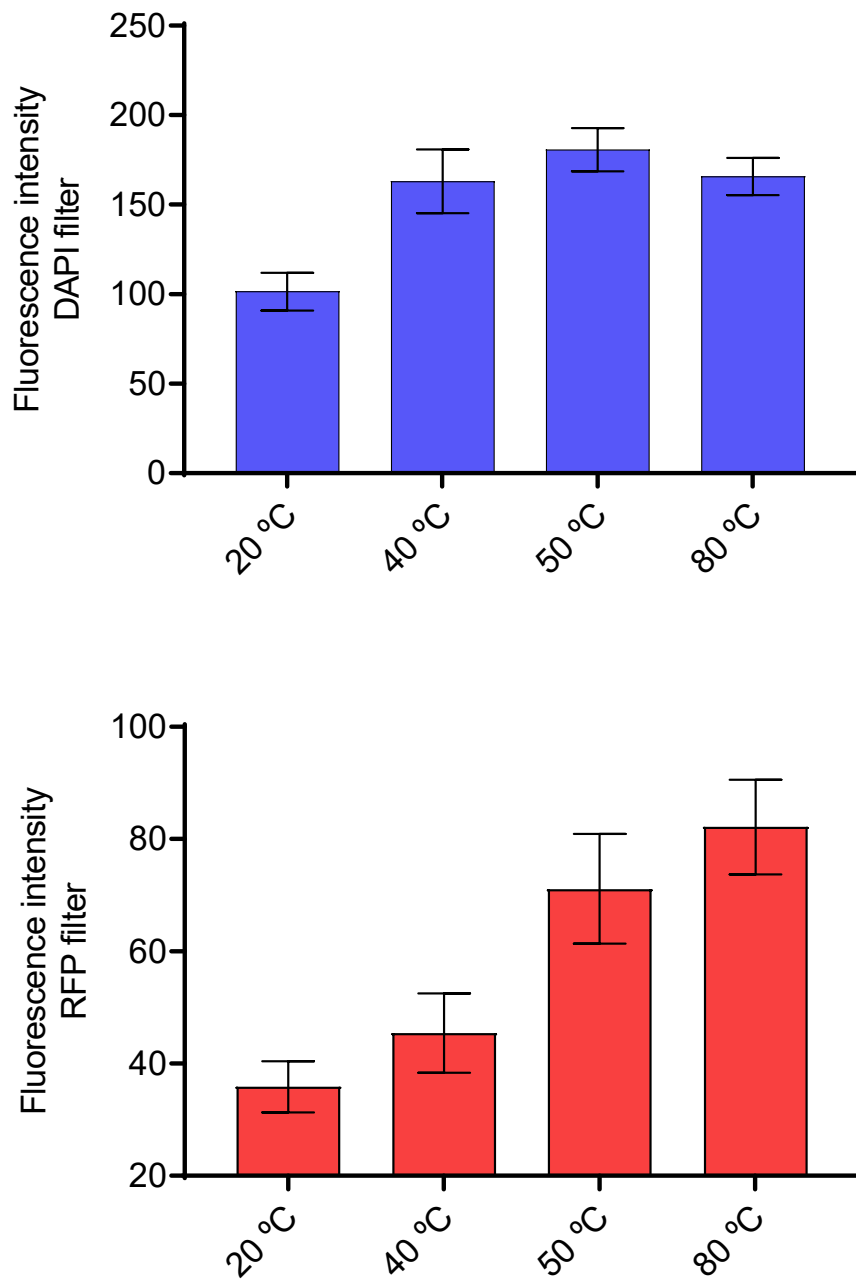

**SI Figure 9.** Fluorescence Intensities during microscopy, blue (top) and red (bottom) of the samples seen in Figure 4 of the main text. Data presented as mean  $\pm$  S.D;  $n=3$ .

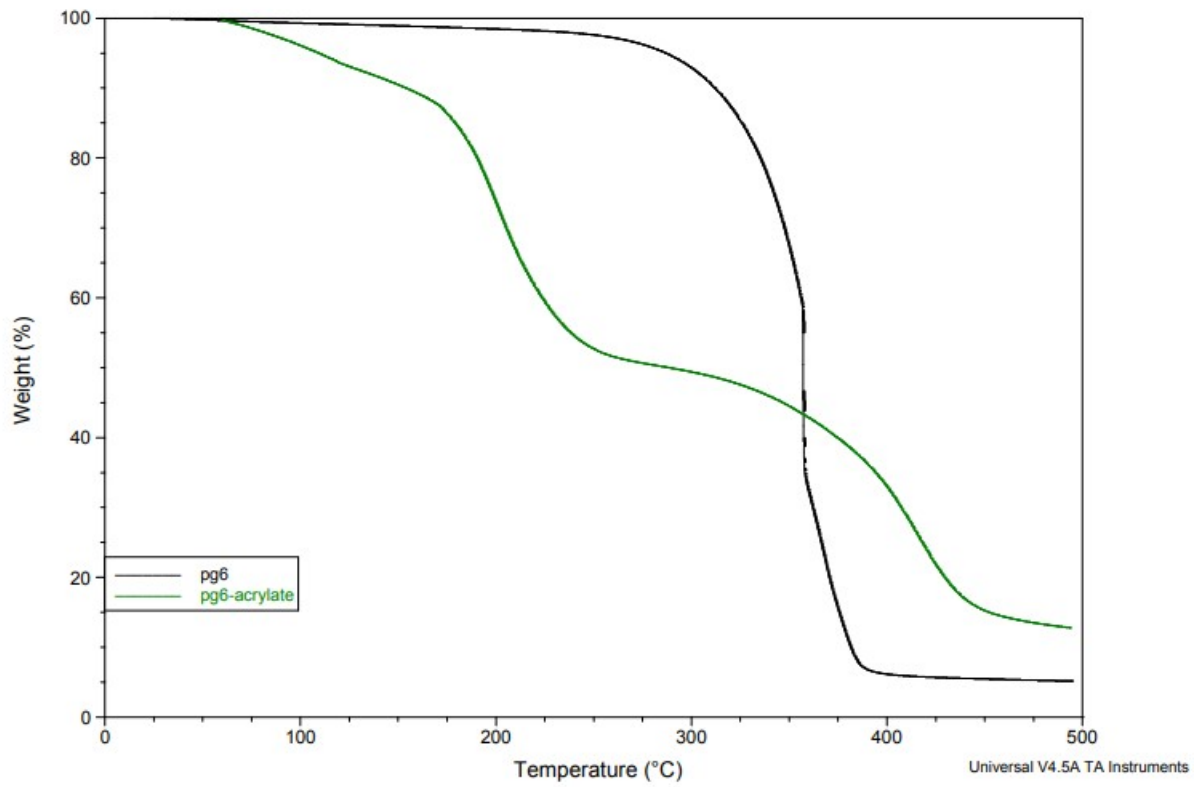

**SI Figure TGA.** TGA of PG6 and PG6 acrylate
